# Supplementary material for: WDR3 undergoes phase separation to mediate the therapeutic mechanism of Nilotinib against osteosarcoma
Source: Research Square preprint supplement (doi:10.21203/rs.3.rs-6611672/v1), 2025-05-15
Supplement: Supplementary file 3 [file ff9a6226f5ca7f3f205bce93.docx]

**WDR3 undergoes phase separation to mediate** **the therapeutic mechanism of Nilotinib against** **osteosarcoma**

**Running title:** WDR3 phase separation in osteosarcoma therapy

Minglei Li1#, Nan Li2#, Yuying Fan3#, Zhan Zhang4, Long Zhou4, Yifan Yu5, Man Ni6, Mingzi Tan7*, WanJie Huang3*, Tong Zhu1*

1Department of Pediatric Orthopaedics, Shengjing Hospital of China Medical University, Shenyang 110004, Liaoning, China

2Department of Pediatrics，The Fourth Afflicted Hospital of China Medical University, Shenyang 110032, Liaoning, China

3Department of Pediatrics, Shengjing Hospital of China Medical University, Shenyang 110004, Liaoning, China

4Department of Orthopedics, Shengjing Hospital of China Medical University, Shenyang 110004, Liaoning, China

5Department of General Surgery, Shengjing Hospital of China Medical University, Shenyang110004, Liaoning, China

6College of Veterinary Medicine, Jiangsu Co-innovation Center for Prevention and Control of Important Animal Infectious Diseases and Zoonoses, Yangzhou University, Yangzhou 225009, Jiangsu, China

7Department of gynecology, Liaoning Cancer Hospital & Istitute, Shenyang 110042, Liaoning, China

#These authors contributed equally to this work.

***Corresponding Author:** Tong Zhu

Address: Department of Pediatric Orthopaedics, Shengjing Hospital of China Medical University, No. 36 Sanhao Street of Heping District, Shenyang 110004, Liaoning, China

Email: [zhutong19860413@163.com](mailto:zhutong19860413@163.com)

***Co-corresponding Author:** Mingzi Tan

Address: Department of gynecology, Liaoning Cancer Hospital & Istitute, No.44 Xiaoheyan Road, Dadong District, Shenyang 110042, Liaoning, China

Email: kitefly1102@126.com

***Co-corresponding Author:** WanJie Huang

Address: Department of Pediatrics，Shengjing Hospital of China Medical University, No. 36 Sanhao Street of Heping District, Shenyang 110004, Liaoning, China

Email: wjhuang@cmu.edu.cn

**Supplementary materials include 2 Figures and 1 Table.**

**
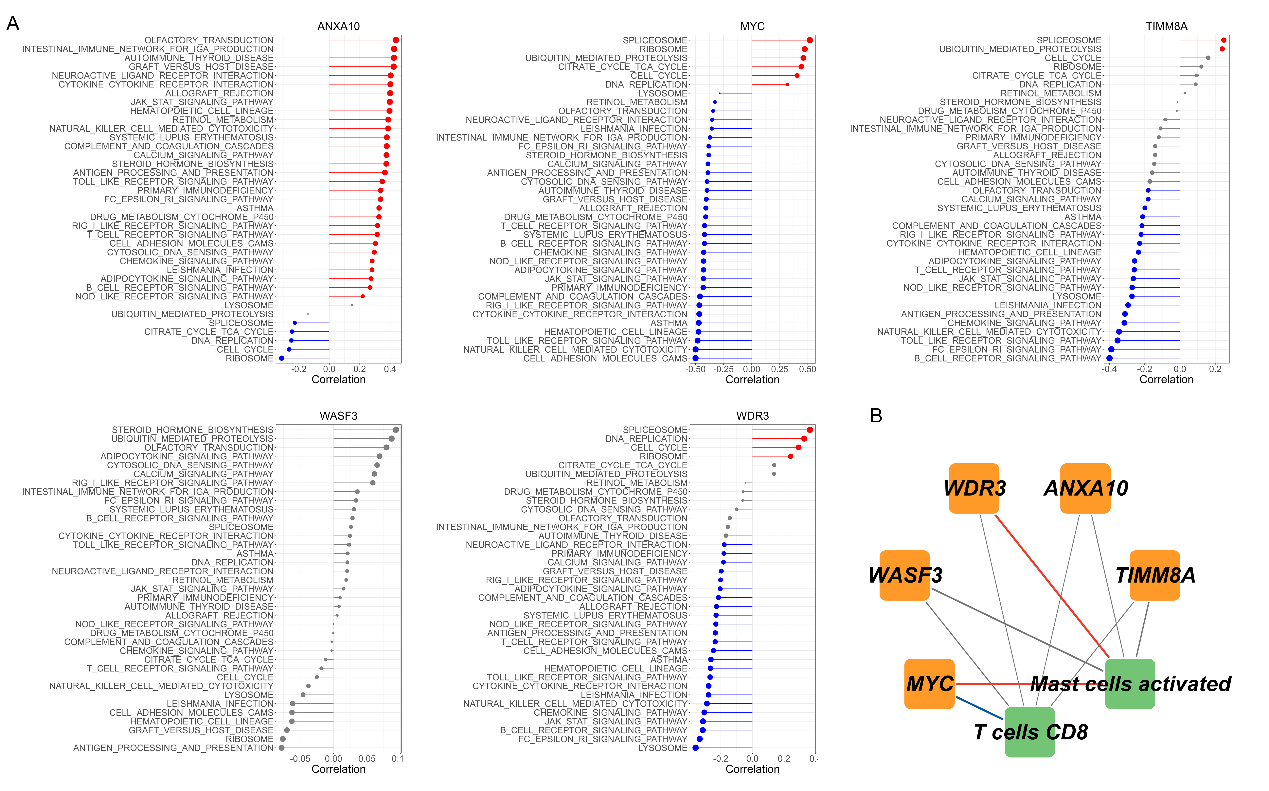
Supplementary Figure 1** Correlations between prognostic signatures with GSVA pathways (A) and immune infiltrating cells (B).


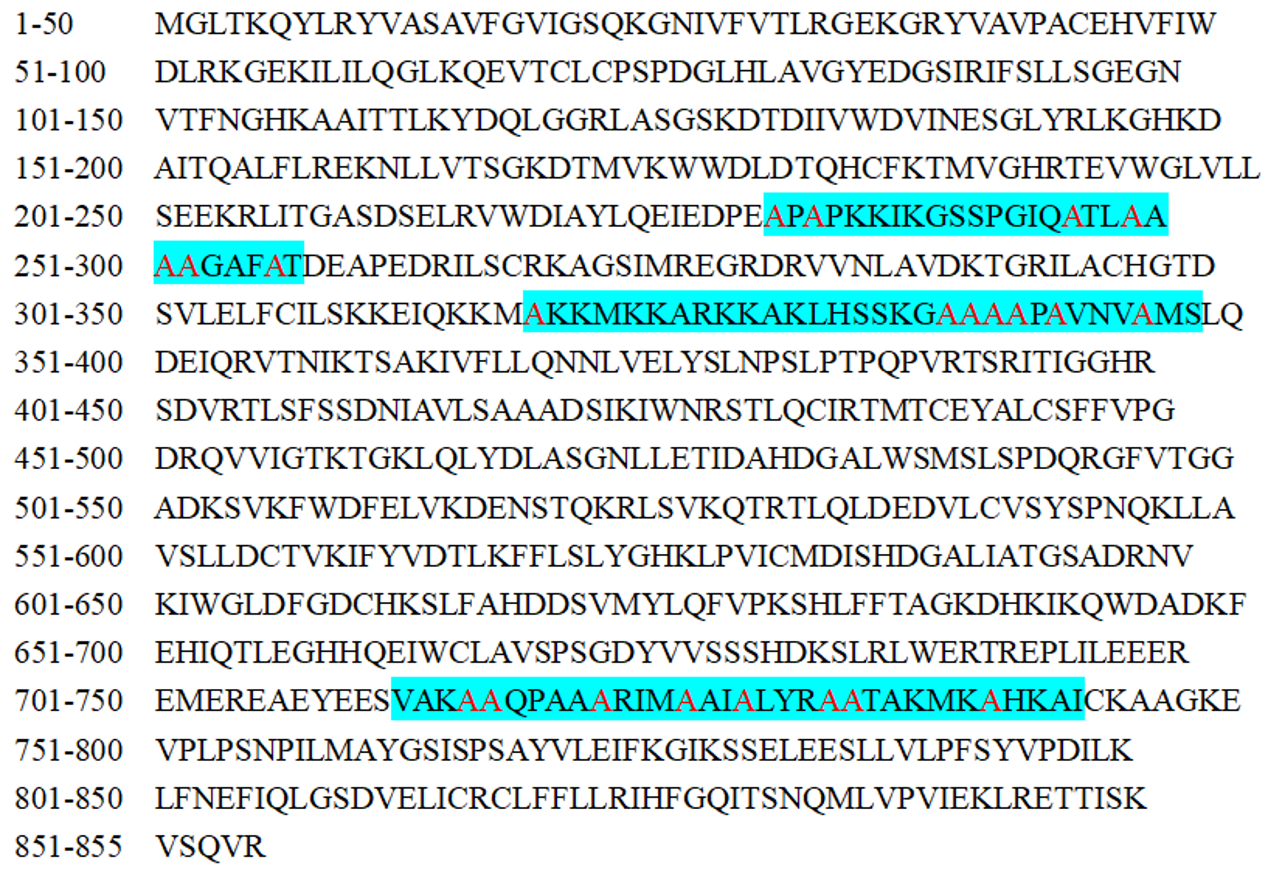
**Supplementary Figure 2** Amino acid mutation sites of three WDR3 IDR mutants.
