# Supplementary figures and images for: WDR3 undergoes phase separation to mediate the therapeutic mechanism of Nilotinib against osteosarcoma
Source: Research Square preprint supplement (doi:10.21203/rs.3.rs-6611672/v1), 2025-05-15

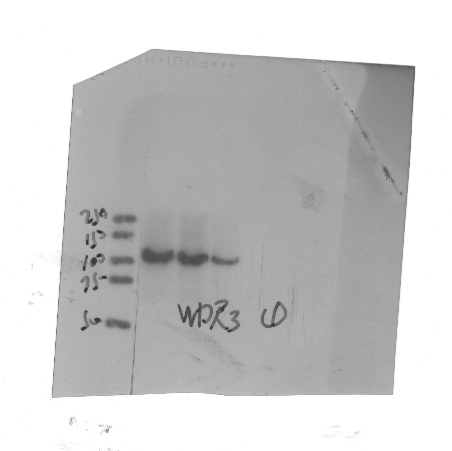
Figure 3C：


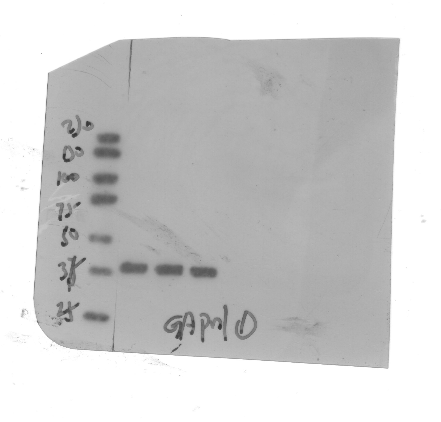


Figure 6C：


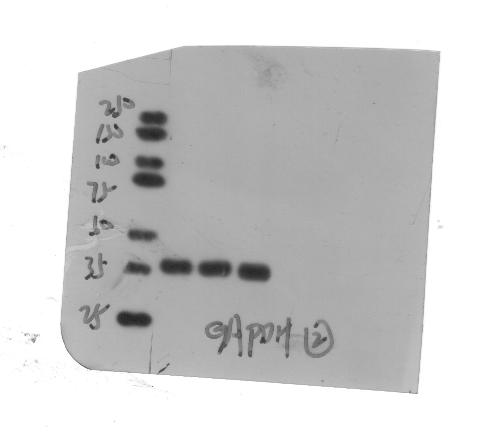

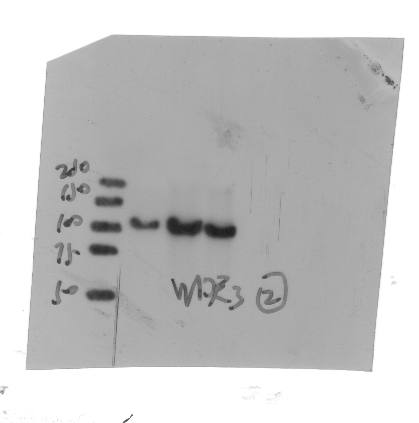


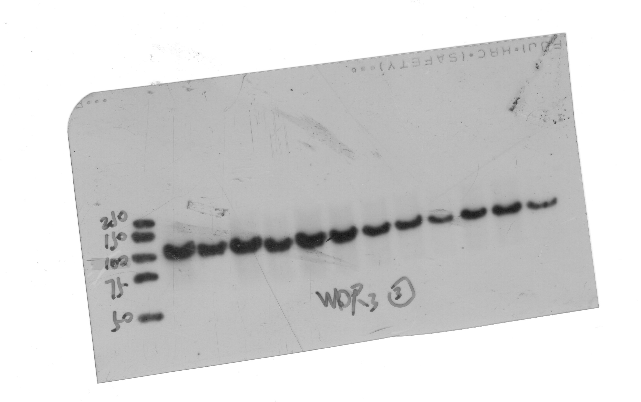
Figure7C：


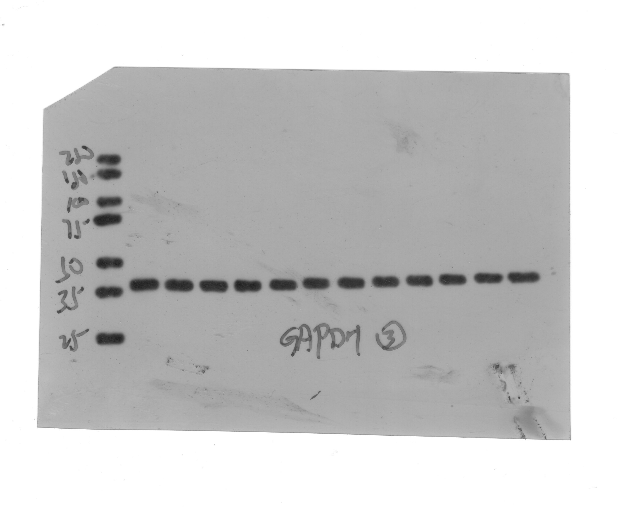

Supplement: Supplementary file 1 [file 71b3358e9f2064e5c8c98a99.docx]
